# Supplementary material
Source: publisher site journal article supplement (https://www.dovepress.com/article/112322)
Supplement: Supplementary file 1 [file get_supplementary_file.php]

## **Institutions that provided ethical approval**

Department of Digestive Surgery, Kawasaki Medical School Hospital, Okayama, Japan

Department of Surgery, Okayama Rosai Hospital, Okayama, Japan

Department of Medical Oncology, Okayama Rosai Hospital, Okayama, Japan

Department of Medical Oncology, Kobe City Medical Center General Hospital, Kobe, Japan

Department of Clinical Oncology, Faculty of Medicine, Kagawa University Hospital, Kagawa, Japan

Department of Medicine, Okayama Saiseikai General Hospital, Okayama, Japan

Department of Surgery, Kagawa Prefectural Central Hospital, Takamatsu, Japan

Department of General Surgery, Kawasaki Medical School, Okayama, Japan

Department of Surgery, Hiroshima City Asa Hospital, Hiroshima, Japan

Department of Surgery, National Hospital Organization Higashihiroshima Medical Center, Higashihiroshima, Japan

Department of Surgery, Kurashiki Medical Center, Okayama, Japan

Department of Gastroenterological Surgery, Okayama University Graduate School of Medicine, Dentistry and Pharmaceutical Sciences, Okayama, Japan

Department of Surgery, Hiroshima City Hospital, Hiroshima, Japan
